# Supplementary material for: A procalcitonin photoelectrochemical immunosensor: NCQDs and Sb2S3 co-sensitized hydrangea-shaped WO3 as a matrix through a layer-by-layer assembly
Source: Royal Society of Chemistry journal article supplement (doi:10.1039/c9nj06118e), 2020-01-01
Supplement: c9nj06118e1.pdf [file c9nj06118e1.pdf]

Electronic supplementary information for New Journal of Chemistry (NJC)

A procalcitonin photoelectrochemical immunosensor: NCQDs  
and  $\text{Sb}_2\text{S}_3$  co-sensitized hydrangea-shaped  $\text{WO}_3$  as matrix  
through layer-by-layer assembly

Xin Liu<sup>a,b</sup>, Chunzhu Bao<sup>a,b</sup>, Xinrong Shao<sup>a,b</sup>, Yong Zhang<sup>a,b</sup>, Nuo Zhang<sup>a,b</sup>, Xu Sun<sup>a,b</sup>, Dawei  
Fan<sup>a,b,\*</sup>, Qin Wei<sup>a,b</sup>, Huangxian Ju<sup>a,b,c</sup>

<sup>a</sup> Collaborative Innovation Center for Green Chemical Manufacturing and Accurate Detection,  
School of Chemistry and Chemical Engineering, University of Jinan, Jinan 250022, P. R. China

<sup>b</sup> Key Laboratory of Interfacial Reaction & Sensing Analysis in Universities of Shandong, School  
of Chemistry and Chemical Engineering, University of Jinan, Jinan 250022, P. R. China

<sup>c</sup> Key Laboratory of Analytical Chemistry for Life Science, School of Chemistry and Chemical  
Engineering, Nanjing University, Nanjing 210023, PR China

**\*Corresponding author**

E-mail: jndxfandawei@126.com (D. Fan)

Tel: +86-531-82760510

## 1. Materials and reagents

ITO glass (resistivity 10  $\Omega$ /sq) was obtained from Zhuhai Kaivo Electronic Components Co., Ltd. China. Bovine serum albumin (BSA) was obtained from Sigma-Aldrich (Beijing, China). Diethylenetriaminepentaacetic acid (DTPA) was obtained from Aladdin Industrial Corporation. 1-ethyl-3-(3-dimethylaminopropyl) carbodiimide hydrochloride (EDC) and N-hydroxysuccinimide (NHS) were obtained from Aladdin Reagent Database Inc (Shanghai, China). Phosphate buffered saline (PBS, 1/15 mol/L  $\text{KH}_2\text{PO}_4$  and 1/15 mol/L  $\text{Na}_2\text{HPO}_4$ ) containing AA was used as an electrolyte for the PEC measurements.

## 2. Apparatus

Electrochemical impedance spectroscopy (EIS) analysis was performed on an RST5200F electrochemical workstation (Zhengzhou Shiruisi Technology Co., Ltd, China) with a three-electrode system in a 5.0 mmol/L  $[\text{Fe}(\text{CN})_6]^{3-/4-}$  solution containing 0.10 mol/L KCl. Scanning electron microscope (SEM) images and energy dispersive spectrometry (EDS) were obtained using a field emission SEM (Zeiss, Germany). X-ray diffraction (XRD) patterns were collected on a D8 advance X-ray diffractometer (Bruker AXS, Germany). UV-vis spectra were obtained on a Shimadzu UV-3101PC spectrometer (Japan). Fourier transform infrared spectra (FTIR) were obtained on Shimadzu VERTEX 70 spectrometer.

3. The SEM image of NCQDs, the EDS image of  $\text{WO}_3/\text{NCQDs}/\text{Sb}_2\text{S}_3$ , and the band gap image of  $\text{Sb}_2\text{S}_3$

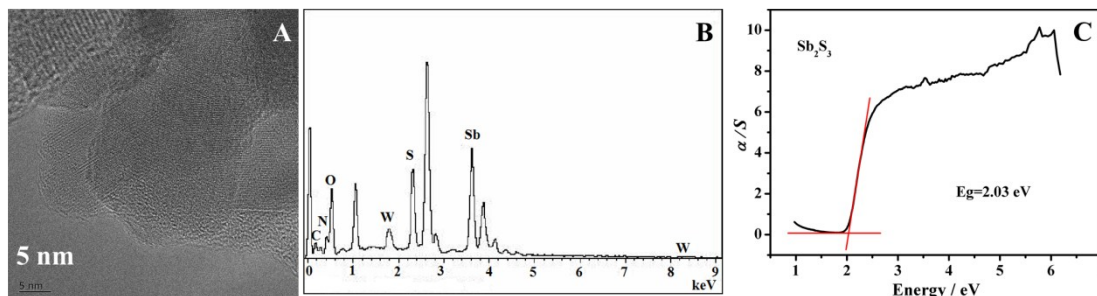

Fig. S1. (A)TEM image of NCQDs and (B) EDS image of  $\text{WO}_3/\text{NCQDs}/\text{Sb}_2\text{S}_3$ , (C) the band gap image of  $\text{Sb}_2\text{S}_3$ .

4. Optimization of experimental conditions

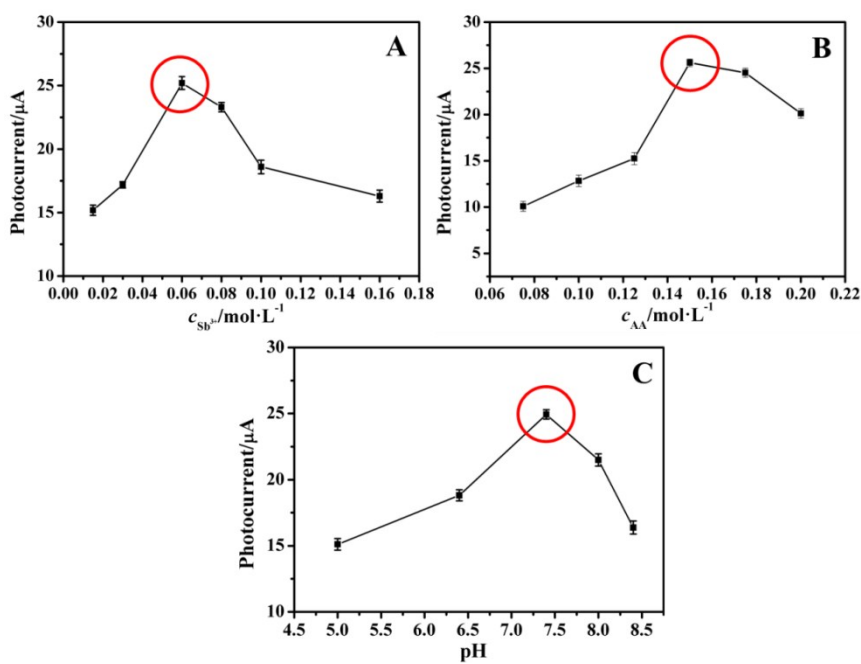

Fig. S2. Optimization of experimental conditions: (A)  $\text{SbCl}_3$  concentration, (B) AA concentration, (C) pH value, the applied potential was 0 V.

5. The specific data graph of RSD

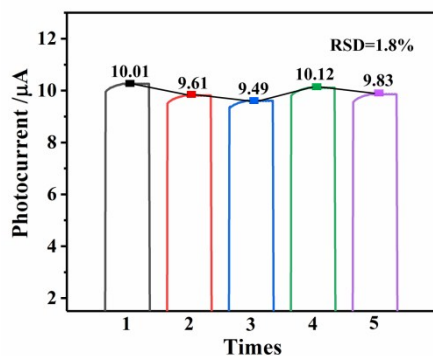

Fig. S3. The specific data graph of RSD

## 6. Simulation parameters of the equivalent circuit components

Table S1. Simulation parameters of the equivalent circuit components

| Electrode                                                                | $R_s$<br>( $\Omega$ ) | $R_{et}$<br>( $\Omega$ ) | $C_{dl}$<br>(F)        | $Z_w$    |
|--------------------------------------------------------------------------|-----------------------|--------------------------|------------------------|----------|
| ITO                                                                      | 64.75                 | 19.57                    | $3.944 \times 10^{-6}$ | 0.010460 |
| ITO/ $\text{WO}_3$                                                       | 63.33                 | 33.82                    | $6.216 \times 10^{-6}$ | 0.012520 |
| ITO/ $\text{WO}_3$ /NCQDs                                                | 64.79                 | 35.64                    | $6.483 \times 10^{-6}$ | 0.011540 |
| ITO/ $\text{WO}_3$ /NCQDs/ $\text{Sb}_2\text{S}_3$                       | 66.34                 | 136.2                    | $5.498 \times 10^{-6}$ | 0.005094 |
| ITO/ $\text{WO}_3$ /NCQDs/ $\text{Sb}_2\text{S}_3$ /PDA                  | 63.09                 | 152.2                    | $9.308 \times 10^{-6}$ | 0.008395 |
| ITO/ $\text{WO}_3$ /NCQDs/ $\text{Sb}_2\text{S}_3$ /PDA/anti-PCT         | 64.65                 | 251.1                    | $5.193 \times 10^{-6}$ | 0.003823 |
| ITO/ $\text{WO}_3$ /NCQDs/ $\text{Sb}_2\text{S}_3$ /PDA/anti-PCT/BSA     | 65.99                 | 456.0                    | $8.788 \times 10^{-6}$ | 0.004481 |
| ITO/ $\text{WO}_3$ /NCQDs/ $\text{Sb}_2\text{S}_3$ /PDA/anti-PCT/BSA/PCT | 63.98                 | 580.6                    | $9.730 \times 10^{-6}$ | 0.003661 |
